# Supplementary material for: Dynamics of the Enteric Virome in a Swine Herd Affected by Non-PCV2/PRRSV Postweaning Wasting Syndrome
Source: MDPI journal article supplement (doi:10.3390/v13122538), 2021-12-17
Supplement: s1 [file s1]

Supplementary Materials

# Dynamics of the Enteric Virome in a Swine Herd Affected by Non-PCV2/PRRSV Postweaning Wasting Syndrome

**Table S1.** Primer and probe sequences and stock concentrations for rotaviruses and porcine astroviruses qPCR assays.

| Primer/Probe         | Concentration | Sequence                                                         |
|----------------------|---------------|------------------------------------------------------------------|
| RVA forward primer   | 40 $\mu$ M    | 5'-GCT AGG GAY AAA ATT GTT GAA GGT A-3'                          |
| RVA reverse primer   | 40 $\mu$ M    | 5'-ATT GGC AAA TTT CCT ATT CCT CC-3'                             |
| RVA probe 1          | 5 $\mu$ M     | 5'-FAM-ATG AAT GGA AAT GAY TTT CAA AC-MGB-3'                     |
| RVA probe 2          | 5 $\mu$ M     | 5'-FAM-ATG AAT GGA AAT AAT TTT CAA AC-MGB-3'                     |
| RVC forward primer   | 40 $\mu$ M    | 5'-ATG TAG CAT GAT TCA CGA ATG GG-3'                             |
| RVC reverse primer   | 40 $\mu$ M    | 5'-ACA TTT CAT CCT CCT GGG GAT C-3'                              |
| RVC probe            | 5 $\mu$ M     | 5'-VIC-GCG TAG GGG CAA ATG CGC ATG A-TAMRA-3'                    |
| RVB forward primer   | 10 $\mu$ M    | 5'-AGT CGG ACC TTT ACA GAC GA-3'                                 |
| RVB reverse primer   | 10 $\mu$ M    | 5'-GCA GGC GTC ATA TGG AGA AG-3'                                 |
| RVH forward primer   | 10 $\mu$ M    | 5'- GGA CTA AAG AAG GAG CTG CC-3'                                |
| RVH reverse primer   | 10 $\mu$ M    | 5'- TCA GTC CTG TCC ATC ACC AT-3'                                |
| PAstV forward primer | 10 $\mu$ M    | 5'-CTS YAT GGG AAA CTC CTK WGY-3'                                |
| PAstV reverse primer | 10 $\mu$ M    | 5'-YTT TGG TCC KCC CCY CCA AA-3'                                 |
| PAstV1 probe         | 10 $\mu$ M    | 5'-FAM-ATG GAC GAG /ZEN/ GAA CAT CCC TTC AAA TGC<br>T-3IABkFQ-3' |
| PAstV2 probe         | 10 $\mu$ M    | 5'-SUN-CCG GGC GCA /ZEN/ CCT TGC CTA AAA TC-<br>3IABkFQ-3'       |
| PAstV3 probe         | 10 $\mu$ M    | 5'-FAM-TCC TTG GCC /ZEN/ ATA ACC TCC CTG ATG ACA-<br>3IABkFQ-3'  |
| PAstV4 probe         | 10 $\mu$ M    | 5'-SUN-AAA TGT TTG /ZEN/ GCT GAA ACA GCG AGG CAC-<br>3IABkFQ-3'  |
| PAstV5 probe         | 10 $\mu$ M    | 5'-ROX-CTC GTG TTG GCT CTG ATC TGC CAG TCT T-<br>3IAbRQSp-3'     |

**Table S2.** Prevalence and viral loads in rectal swab samples of RVA, RVB, RVC and RVH from pigs at different ages and clinical score dynamics.

| Age     | Porcine Rotavirus Specie | Prevalence and viral load <sup>a</sup> | Healthy <sup>b</sup> | Recovered       | Wasting         |
|---------|--------------------------|----------------------------------------|----------------------|-----------------|-----------------|
| 3 weeks | RVA                      | <i>n</i>                               | 61/76                | 11/19           | 26/29           |
|         |                          | log10 cop/ $\mu$ L                     | 1.79 $\pm$ 1.32      | 1.43 $\pm$ 0.91 | 1.67 $\pm$ 1.62 |
|         | RVB                      | <i>n</i>                               | 0/76                 | 1/19            | 0/29            |
|         |                          | log10 cop/ $\mu$ L                     | n/a                  | 2.30            | n/a             |
|         | RVC                      | <i>n</i>                               | 37/76                | 10/19           | 20/29           |
|         |                          | log10 cop/ $\mu$ L                     | 1.08 $\pm$ 1.08      | 1.35 $\pm$ 0.77 | 1.52 $\pm$ 1.62 |
|         | RVH                      | <i>n</i>                               | 0/76                 | 1/19            | 0/29            |
|         |                          | log10 cop/ $\mu$ L                     | n/a                  | 0.17            | n/a             |
| 7 dpw   | RVA                      | <i>n</i>                               | 17/17                | 12/13           | 9/10            |
|         |                          | log10 cop/ $\mu$ L                     | 2.62 $\pm$ 1.45      | 2.71 $\pm$ 1.88 | 3.20 $\pm$ 1.70 |
|         | RVB                      | <i>n</i>                               | 8/17                 | 3/13            | 5/10            |
|         |                          | log10 cop/ $\mu$ L                     | 1.18 $\pm$ 0.39      | 1.67 $\pm$ 1.30 | 1.30 $\pm$ 0.65 |
|         | RVC                      | <i>n</i>                               | 9/17                 | 5/13            | 5/10            |
|         |                          | log10 cop/ $\mu$ L                     | 2.40 $\pm$ 1.28      | 3.57 $\pm$ 1.30 | 1.71 $\pm$ 1.34 |
|         | RVH                      | <i>n</i>                               | 0/17                 | 0/13            | 0/10            |
|         |                          | log10 cop/ $\mu$ L                     | n/a                  | n/a             | n/a             |
| 3 wpw   | RVA                      | <i>n</i>                               | 13/20                | 2/5             | 6/15            |
|         |                          | log10 cop/ $\mu$ L                     | 2.49 $\pm$ 1.41      | 2.13 $\pm$ 2.63 | 2.25 $\pm$ 1.15 |
|         | RVB                      | <i>n</i>                               | 6/20                 | 1/5             | 5/15            |
|         |                          | log10 cop/ $\mu$ L                     | 1.64 $\pm$ 1.12      | 0.49            | 0.81 $\pm$ 0.32 |
|         | RVC                      | <i>n</i>                               | 7/20                 | 2/5             | 4/15            |
|         |                          | log10 cop/ $\mu$ L                     | 1.78 $\pm$ 1.20      | 1.97 $\pm$ 0.61 | 1.89 $\pm$ 1.78 |
|         | RVH                      | <i>n</i>                               | 1/20                 | 0/5             | 1/15            |
|         |                          | log10 cop/ $\mu$ L                     | 0.49                 | n/a             | 0.59            |
| 6 wpw   | RVA                      | <i>n</i>                               | 1/7                  | 0/4             | 3/19            |
|         |                          | log10 cop/ $\mu$ L                     | 1.75                 | n/a             | 1.49 $\pm$ 1.06 |
|         | RVB                      | <i>n</i>                               | 1/7                  | 0/4             | 0/19            |
|         |                          | log10 cop/ $\mu$ L                     | 1.25                 | n/a             | n/a             |
|         | RVC                      | <i>n</i>                               | 2/7                  | 0/4             | 4/19            |
|         |                          | log10 cop/ $\mu$ L                     | 3.54 $\pm$ 2.53      | n/a             | 2.33 $\pm$ 0.63 |
|         | RVH                      | <i>n</i>                               | 0/0                  | 0/0             | 2/19            |
|         |                          | log10 cop/ $\mu$ L                     | n/a                  | n/a             | 1.45 $\pm$ 1.10 |

<sup>a</sup> Prevalence is expressed as the number of positive pigs/number of pigs in the analysis group. Viral loads in rectal swab samples are expressed as log10 copies/ $\mu$ L of rectal swab extract. <sup>b</sup> Clinical score dynamics: healthy: score patter 1-1-1; recovered: score pattern 2/3-x-1 or x-2/3-1; wasting: score pattern x-x-2/3.

**Table S3.** Prevalence and viral loads in rectal swab samples of PAstV1, PAstV2, PAstV3, PAstV4 and PAstV5 from pigs at different ages and clinical score dynamics.

| Age     | Porcine<br>Astrovirus<br>Lineages | Prevalence and<br>viral load <sup>a</sup> | Healthy <sup>b</sup> | Recovered   | Wasting     |
|---------|-----------------------------------|-------------------------------------------|----------------------|-------------|-------------|
| 3 weeks | PAstV1                            | n                                         | 0/76                 | 1/19        | 0/29        |
|         |                                   | log10 cop/μL                              | n/a                  | 0.17        | n/a         |
|         | PAstV2                            | n                                         | 0/76                 | 0/19        | 0/29        |
|         |                                   | log10 cop/μL                              | n/a                  | n/a         | n/a         |
|         | PAstV3                            | n                                         | 36/76                | 12/19       | 19/29       |
|         |                                   | log10 cop/μL                              | 2.59 ± 0.82          | 2.88 ± 1.03 | 2.67 ± 1.23 |
|         | PAstV4                            | n                                         | 46/76                | 9/19        | 16/29       |
|         |                                   | log10 cop/μL                              | 2.88 ± 1.43          | 2.81 ± 1.03 | 2.83 ± 1.26 |
|         | PAstV5                            | n                                         | 0/76                 | 2/19        | 0/29        |
|         |                                   | log10 cop/μL                              | n/a                  | 0.52 ± 0.20 | n/a         |
| 7 dpw   | PAstV1                            | n                                         | 16/17                | 11/13       | 8/10        |
|         |                                   | log10 cop/μL                              | 1.60 ± 0.54          | 1.70 ± 0.80 | 1.56 ± 0.66 |
|         | PAstV2                            | n                                         | 15/17                | 12/13       | 9/10        |
|         |                                   | log10 cop/μL                              | 2.62 ± 0.78          | 2.18 ± 0.98 | 2.26 ± 1.06 |
|         | PAstV3                            | n                                         | 0/17                 | 0/13        | 0/10        |
|         |                                   | log10 cop/μL                              | n/a                  | n/a         | n/a         |
|         | PAstV4                            | n                                         | 14/17                | 10/13       | 5/10        |
|         |                                   | log10 cop/μL                              | 2.57 ± 0.82          | 2.81 ± 0.67 | 2.36 ± 1.24 |
|         | PAstV5                            | n                                         | 15/17                | 5/13        | 6/10        |
|         |                                   | log10 cop/μL                              | 2.40 ± 1.01          | 2.59 ± 0.61 | 2.82 ± 0.87 |
| 3 wpw   | PAstV1                            | n                                         | 8/20                 | 2/5         | 10/15       |
|         |                                   | log10 cop/μL                              | 1.43 ± 0.74          | 1.12 ± 0.20 | 1.04 ± 0.55 |
|         | PAstV2                            | n                                         | 1/20                 | 1/5         | 2/15        |
|         |                                   | log10 cop/μL                              | 0.72                 | 2.00        | 1.76 ± 0.39 |
|         | PAstV3                            | n                                         | 0/20                 | 0/5         | 0/15        |
|         |                                   | log10 cop/μL                              | n/a                  | n/a         | n/a         |
|         | PAstV4                            | n                                         | 16/20                | 5/5         | 11/15       |
|         |                                   | log10 cop/μL                              | 2.51 ± 0.77          | 2.43 ± 0.45 | 2.37 ± 0.60 |
|         | PAstV5                            | n                                         | 2/20                 | 1/5         | 4/15        |
|         |                                   | log10 cop/μL                              | 1.67 ± 0.69          | 1.28        | 2.49 ± 1.40 |
| 6 wpw   | PAstV1                            | n                                         | 4/7                  | 3/4         | 7/19        |
|         |                                   | log10 cop/μL                              | 1.26 ± 0.52          | 1.06 ± 0.37 | 1.25 ± 0.64 |
|         | PAstV2                            | n                                         | 1/7                  | 2/4         | 4/19        |
|         |                                   | log10 cop/μL                              | 1.31                 | 1.27 ± 0.92 | 1.18 ± 0.37 |
|         | PAstV3                            | n                                         | 0/7                  | 1/4         | 1/19        |
|         |                                   | log10 cop/μL                              | n/a                  | 2.30        | 1.80        |
|         | PAstV4                            | n                                         | 4/7                  | 1/4         | 15/19       |
|         |                                   | log10 cop/μL                              | 2.95 ± 0.66          | 2.85        | 2.53 ± 0.43 |
|         | PAstV5                            | n                                         | 0/7                  | 0/4         | 0/19        |
|         |                                   | log10 cop/μL                              | n/a                  | n/a         | n/a         |

<sup>a</sup> Prevalence is expressed as the number of positive pigs/number of pigs in the analysis group. Viral loads in rectal swab samples are expressed as log10 copies/μL of rectal swab extract. <sup>b</sup> Clinical score dynamics: healthy: score pattern 1-1-1; recovered: score pattern 2/3-x-1 or x-2/3-1; wasting: score pattern x-x-2/3.
